# Supplementary material for: Optimization of cultural conditions for pectinase production by Diaporthe isolate Z1-1N and its pathogenicity on kiwifruit
Source: PeerJ. 2025 Apr 16;13:e19207. doi: 10.7717/peerj.19207 (PMC12009023; doi:10.7717/peerj.19207)
Supplement: Supplemental Information 1 [file peerj-13-19207-s001.xlsx]

## Sheet: pH
			Enzymic activity
	PMG			PG
pH4.5	8.77021	9.16755	8.8317	9.30544	9.08324	9.35015
pH5.0	9.23649	9.22532	8.68963	8.7609	9.25746	8.45532
pH5.5	9.21274	8.85592	9.40093	9.20063	9.27097	9.35854
pH6.0	9.12051	8.85453	9.22951	9.51459	9.38975	9.07299
pH6.5	9.09349	9.43447	8.72876	9.63384	9.09116	9.31522
pH7.0	9.41677	9.24767	9.31056	9.29519	9.53834	9.18526
pH7.5	10.0167	10.4751	9.92544	9.56024	9.75495	9.77358
pH8.0	8.83636	9.16196	9.10141	8.705	8.40828	8.57876
pH8.5	8.92859	8.75205	9.0348	8.50656	8.85406	8.69242
pH9.0	8.81307	8.54942	8.73295	8.52333	8.89226	8.27878

## Sheet: Temperature
			Enzymic activity
	PMG			PG
18℃	8.49212	8.40036	8.42318	6.77792	7.01735	6.93537
23℃	8.89319	8.75717	8.96679	8.26061	8.33654	8.1926
28℃	10.1565	10.1956	10.0652	9.56024	9.75495	9.77358
33℃	8.30906	8.43017	8.34306	8.90903	8.83822	9.00079
38℃	7.29684	7.21579	7.43752	6.39223	6.28975	6.4784

## Sheet: Time
			Enzymic activity
	PMG			PG
1d	9.27516	9.11585	9.08557	7.87678	7.65366	7.59962
2d	9.95292	9.84671	10.149	10.101	10.0759	10.184
3d	10.4225	10.5259	10.428	9.83087	9.89795	9.9464
4d	9.17314	9.35807	9.39953	10.3982	10.381	10.7532
5d	8.60532	8.44694	8.58063	8.70407	8.59833	8.60671
6d	8.30999	8.19819	8.01885	7.42075	7.5577	7.53441
7d	7.63223	7.42727	7.41935	6.86177	6.87947	6.94748

## Sheet: Orthogonal Experiment
			Enzymic Activity
Conditions		PMG			PG
25℃-pH6.5-2d	9.86628	9.73585	9.50341	8.25409	9.35574	9.4722
25℃-pH7.0-3d	9.76752	9.75215	9.74423	8.82006	9.54859	9.27003
25℃-pH7.5-4d	9.31429	9.26258	9.34223	8.18795	7.89774	7.50506
28℃-pH6.5-3d	11.0252	11.0439	10.7793	10.0903	10.0065	9.90121
28℃-pH7.0-4d	9.58632	10.1495	10.2701	9.02269	9.87652	9.34643
28℃-pH7.5-2d	11.2642	11.3038	11.117	9.8891	10.0917	10.1863
31℃-pH6.5-4d	8.90018	8.80934	8.47955	6.08572	5.93899	6.39735
31℃-pH7.0-2d	10.4527	10.8007	10.7294	8.64444	8.37334	8.58994
31℃-pH7.5-3d	9.35714	9.45636	9.58772	8.19307	8.82052	8.13717

## Sheet: Disease Degree
			Diameter of the lesion (cm)
Treatments	Fruit 1	Fruit 2	Fruit 3	Fruit 4	Fruit 5	Fruit 6	Fruit 7	Fruit 8	Fruit 9	Fruit 10
Sterile water	0	0	0	0	0	0	0	0	0	0
Pectinase extract	2.75	3.1	1.75	1.85	1.65	1.5	2.55	1.8	5.6	1.65
Sterile plug	0	0	0	0	0	0	0	0	0	0
Mycelial plug	5.6	5.25	4.05	5.15	4.95	5.45	5.25	4.9	4.4	5.25
